# Supplementary material for: The Association of Neighborhood-Level Deprivation with Glioblastoma Outcomes: A Single Center Cohort Study
Source: Research Square preprint supplement (doi:10.21203/rs.3.rs-5913656/v1), 2025-01-30
Supplement: Supplementary file 1 [file 429329142e6c308b60e5e8e7.docx]

Supplementary Content:

**Supplementary Methods:**

*Defining Variables*

Insurance status was retrieved at time of diagnosis and categorized as uninsured/self-pay, public (including Medicaid and Medicare-only coverage), and private insurance. Using patient zip codes, we estimated distance to institution in miles through methods detailed by the National Ambulatory Medical Care Survey (NAMCS).1 Estimated median household was retrieved from the US Census Bureau 5-year estimated household income in 2022 inflation-adjusted dollars.2 Income classes were divided according to the Pew Research Center reports for 2022.3 Rural Urban Commuting Area (RUCA) codes were categorized in accordance Economic Research Service (ERS) of the United States Department of Agriculture (USDA).3 RUCA classifies U.S. census tracts using measures of population density, urbanization, and daily commuting into four main categories (Metropolitan, Micropolitan, Small town and Rural).

*Statistical Analysis*

Assumptions for each test was assessed, multivariate cox proportional hazards models were utilized to assess the association of clinical variables and socioeconomic variables with OS. Schoenfeld’s residuals were used in order to assess assumptions of proportionality (Supplementary Content, Table 1S, Figure 1S).4

There was a high degree of missing values for MGMT methylation (39%) and IDH mutation (33%) status. We assumed data was missing at random (MAR) due to inconsistent testing before the release of the 2016 WHO Guidelines on Tumors of the Central Nervous System.5 We performed multiple imputationsusing the random forest imputations method and multiple imputations with chained equations (MICE) for missing values of MGMT status and IDH status with 50 iterations.6 Convergence diagrams were plotted for each method. Imputation variance and pooled models were assessed for each imputation method to ensure agreement after imputation. Multiple imputation diagnostics and variance analysis can be found in the supplement.

**Table 1S**. Schoenfeld’s residuals for Multivariate Cox Regression Models

| Random Forest Model | chisq | df | p |
| --- | --- | --- | --- |
| Sex | 1.249 | 1 | 0.264 |
| high_ADI | 0.605 | 1 | 0.437 |
| income_class | 6.183 | 2 | 0.045 |
| age_cat | 24.65 | 4 | 5.90E-05 |
| african_american | 0.795 | 1 | 0.373 |
| insurance_cat | 6.908 | 2 | 0.032 |
| IDH-Mut | 1.174 | 1 | 0.279 |
| MGMT-methylated | 1.271 | 1 | 0.26 |
| rural | 1.331 | 1 | 0.249 |
| surgical_procedure | 42.627 | 2 | 5.50E-10 |
| chemotherapy | 45.183 | 1 | 1.80E-11 |
| radiotherapy | 52.136 | 1 | 5.20E-13 |
| african_american:insurance_cat | 0.194 | 2 | 0.907 |
| GLOBAL | 99.087 | 20 | 1.80E-12 |

| MICE | chisq | df | p |
| --- | --- | --- | --- |
| Sex | 0.6258 | 1 | 0.429 |
| high_ADI | 0.996 | 1 | 0.318 |
| income_class | 5.7912 | 2 | 0.055 |
| age_cat | 30.1305 | 4 | 4.60E-06 |
| african_american | 0.2559 | 1 | 0.613 |
| insurance_cat | 7.3515 | 2 | 0.025 |
| IDH-Mut | 0.0387 | 1 | 0.844 |
| MGMT-methylated | 1.8026 | 1 | 0.179 |
| rural | 2.0546 | 1 | 0.152 |
| surgical_procedure | 36.5169 | 2 | 1.20E-08 |
| chemotherapy | 46.4383 | 1 | 9.50E-12 |
| radiotherapy | 58.5788 | 1 | 2.00E-14 |
| african_american:insurance_cat | 0.4117 | 2 | 0.814 |
| GLOBAL | 101.3728 | 20 | 7.10E-13 |

| Complete Case analysis | chisq | df | p |
| --- | --- | --- | --- |
| Sex | 4.66E-05 | 1 | 0.99455 |
| high_ADI | 1.45E+00 | 1 | 0.22853 |
| income_class | 1.57E+00 | 2 | 0.45529 |
| age_cat | 7.45E+00 | 4 | 0.11384 |
| african_american | 1.22E-01 | 1 | 0.72695 |
| insurance_cat | 9.17E+00 | 2 | 0.01019 |
| IDH-Mut | 5.63E-01 | 1 | 0.45317 |
| MGMT-methylated | 2.41E-01 | 1 | 0.62328 |
| rural | 1.55E-01 | 1 | 0.69411 |
| surgical_procedure | 3.61E+00 | 2 | 0.16483 |
| chemotherapy | 1.31E+01 | 1 | 0.00029 |
| radiotherapy | 1.66E+01 | 1 | 4.50E-05 |
| african_american:insurance_cat | 3.83E-01 | 2 | 0.82568 |
| GLOBAL | 3.53E+01 | 20 | 0.01846 |

| Post WHO 2016 | chisq | df | p |
| --- | --- | --- | --- |
| Sex | 0.7883 | 1 | 0.37461 |
| high_ADI | 4.5163 | 1 | 0.03357 |
| income_class | 0.9205 | 2 | 0.63114 |
| age_cat | 5.2903 | 4 | 0.25879 |
| african_american | 0.3413 | 1 | 0.55905 |
| insurance_cat | 11.2544 | 2 | 0.0036 |
| IDH-Mut | 1.5516 | 1 | 0.2129 |
| MGMT-methylated | 1.2183 | 1 | 0.26969 |
| rural | 0.0155 | 1 | 0.90096 |
| surgical_procedure | 4.7607 | 2 | 0.09252 |
| chemotherapy | 19.0805 | 1 | 1.30E-05 |
| radiotherapy | 21.7255 | 1 | 3.10E-06 |
| african_american:insurance_cat | 0.0318 | 2 | 0.98421 |
| GLOBAL | 52.1994 | 20 | 0.00011 |

**Table 2S.** Pooled Cox Regression for Random Forest Imputation

| **Pooled cox Proportional Hazards Analysis** | |  |  |  |  |
| --- | --- | --- | --- | --- | --- |
| **Term** | **Estimate** | **Std. Error** | **Statistic** | **DF** | **P-Value** |
| SexMale | 0.05291026 | 0.06053455 | 0.87405069 | 980.36915 | 3.82E-01 |
| **ADI_NATRANK > 75TRUE** | **0.22098405** | **0.06959691** | **3.17519933** | **713.3921** | **1.56E-03** |
| age_cat≥75 | 1.22969736 | 0.14392967 | 8.54373783 | 612.84503 | 1.03E-16 |
| age_cat45-54 | 0.35310925 | 0.12447194 | 2.83685815 | 721.90197 | 4.68E-03 |
| age_cat55-64 | 0.59977806 | 0.11820604 | 5.0740053 | 559.64431 | 5.31E-07 |
| age_cat65-74 | 1.06730217 | 0.12972426 | 8.22746788 | 475.41329 | 1.85E-15 |
| african_american | -0.1757958 | 0.14800804 | -1.1877451 | 968.95253 | 2.35E-01 |
| insurance_catPublic | -0.1811729 | 0.08005416 | -2.2631298 | 780.87515 | 2.39E-02 |
| insurance_catSelf-Pay/Indigent | 0.12527752 | 0.18184071 | 0.68894097 | 1106.19665 | 4.91E-01 |
| IDH-Mut | -0.4578104 | 0.15307009 | -2.9908548 | 328.70944 | 2.99E-03 |
| MGMT-methylated | -0.5924692 | 0.10245693 | -5.782617 | 98.59674 | 8.67E-08 |
| rural | 0.00258907 | 0.07579693 | 0.03415801 | 630.85091 | 9.73E-01 |
| surgical_procedureComplete resection | -0.4668157 | 0.07600114 | -6.1422201 | 774.1259 | 1.30E-09 |
| surgical_procedurePartial Resection | -0.3478059 | 0.08527324 | -4.0787228 | 879.79046 | 4.94E-05 |
| chemotherapyYes | -0.2197899 | 0.13247789 | -1.6590684 | 1086.18591 | 9.74E-02 |
| radiotherapyYes | -0.6812608 | 0.14479848 | -4.7048889 | 898.78694 | 2.94E-06 |
| african_american: Public | 0.22061071 | 0.19828863 | 1.11257366 | 1025.70274 | 2.66E-01 |
| african_american: Self Pay/Indigent | 0.77455086 | 0.43246552 | 1.79101181 | 1050.12313 | 7.36E-02 |

**Table 3S.** Pooled Cox Regression for MICE

| **Pooled cox Proportional Hazards Analysis** | | | |  |  |
| --- | --- | --- | --- | --- | --- |
| **Term** | **Estimate** | **Std. Error** | **Statistic** | **df** | **p.value** |
| SexMale | 0.05219202 | 0.06247096 | 0.83546063 | 763.0443 | 0.4037199 |
| ADI_NATRANK > 75TRUE | 0.23009093 | 0.06973499 | 3.29509483 | 710.1873 | 0.0016901 |
| age_cat75 | 1.17297999 | 0.15067451 | 7.78486003 | 435.7822 | 5.13E-14 |
| age_cat45-54 | 0.30094866 | 0.12092943 | 2.48863035 | 870.4213 | 0.01300956 |
| age_cat55-64 | 0.53197471 | 0.11355937 | 4.68455142 | 758.7342 | 3.32E-06 |
| age_cat65-74 | 0.99245525 | 0.12706796 | 7.81042878 | 558.7545 | 2.84E-14 |
| african_american | -0.2113588 | 0.15344535 | -1.3774206 | 724.764 | 0.1688075 |
| insurance_catPublic | -0.2122988 | 0.08505148 | -2.6355672 | 720.4628 | 0.00858037 |
| insurance_catSelf-Pay/Indigent | 0.08587514 | 0.18142649 | 0.47333297 | 1120.2047 | 0.6360679 |
| IDH-Mut | -0.572072 | 0.16063905 | -3.5612264 | 122.0569 | 5.27E-04 |
| MGMT-methylated | -0.5806464 | 0.1019292 | -5.6965656 | 102.0117 | 1.19E-07 |
| rural | 0.00460526 | 0.00755304 | 0.6097227 | 659.1512 | 0.513998 |
| surgical_procedureComplete resection | -0.4860164 | 0.07483761 | -6.49428 | 906.6632 | 1.37E-10 |
| surgical_procedurePartial Resection | -0.3522226 | 0.08585348 | -4.102601 | 827.322 | 4.49E-05 |
| chemotherapyYes | -0.2243171 | 0.13635704 | -1.6450717 | 932.111 | 0.1002922 |
| radiotherapyYes | -0.6748838 | 0.14709469 | -4.5880907 | 835.5717 | 5.16E-06 |
| african_american: Public | 0.26464671 | 0.20062459 | 1.31811402 | 940.5318 | 0.1874521 |
| african_american: Self Pay/Indigent | 0.76754055 | 0.43159912 | 1.7783645 | 1062.4099 | 0.07562993 |

**Table 4S.** Random Forest Imputation Diagnostics

| **Term** | **m** | **Estimate** | **Within** | **Between** | **Total** | **dfcom** | **df** | **RIV** | **Lambda** | **FMI** | **Relative Efficiency** |
| --- | --- | --- | --- | --- | --- | --- | --- | --- | --- | --- | --- |
| SexMale | 50 | 0.05291026 | 0.00338909 | 0.00026994 | 0.00366443 | 1197 | 980.36915 | 0.08124344 | 0.07513889 | 0.0770199 | 0.998461971 |
| ADI_NATRANK > 75TRUE | 50 | 0.22098405 | 0.04145556 | 0.00684484 | 0.04843729 | 1197 | 713.3921 | 0.16841488 | 0.14413962 | 0.14652899 | 0.997077983 |
| age_cat75 | 50 | 1.22969736 | 0.17109317 | 0.03535719 | 0.2071575 | 1197 | 612.84503 | 0.21078769 | 0.17409137 | 0.17677357 | 0.996476984 |
| age_cat45-54 | 50 | 0.35310925 | 0.01329678 | 0.02153417 | 0.01549327 | 1197 | 721.90197 | 0.16518923 | 0.1417703 | 0.14413815 | 0.997125523 |
| age_cat55-64 | 50 | 0.59977806 | 0.01129167 | 0.00262843 | 0.01397267 | 1197 | 559.64431 | 0.237432 | 0.19187479 | 0.19474739 | 0.996120164 |
| age_cat65-74 | 50 | 1.06730217 | 0.01305713 | 0.03697307 | 0.01682838 | 1197 | 475.41329 | 0.28882709 | 0.22410073 | 0.22734436 | 0.995473693 |
| african_american | 50 | -0.1757958 | 0.20196271 | 0.01676579 | 0.21906381 | 1197 | 968.95253 | 0.08467456 | 0.07806448 | 0.07996156 | 0.998403322 |
| insurance_catPublic | 50 | -0.1811729 | 0.00560204 | 0.00790811 | 0.00640867 | 1197 | 780.87515 | 0.1439881 | 0.12586503 | 0.12809532 | 0.99744464 |
| insurance_catSelf-Pay/Indigent | 50 | 0.12527752 | 0.03174782 | 0.01292382 | 0.03366045 | 1197 | 1106.19665 | 0.04152191 | 0.03986658 | 0.0415978 | 0.999168736 |
| IDH-Mut | 50 | -0.4578104 | 0.16384521 | 0.06907776 | 0.23430452 | 1197 | 328.70944 | 0.43003585 | 0.30071683 | 0.30493307 | 0.993938307 |
| MGMT-methylated | 50 | -0.5924692 | 0.03956975 | 0.06412203 | 0.10497422 | 1197 | 98.59674 | 1.65289065 | 0.62305269 | 0.63047315 | 0.987547556 |
| rural | 50 | 0.00258907 | 0.00477759 | 0.00094862 | 0.00574518 | 1197 | 630.85091 | 0.20252652 | 0.16841751 | 0.17104141 | 0.996590834 |
| surgical_procedureComplete resection | 50 | -0.4668157 | 0.00503887 | 0.00722845 | 0.00576173 | 1197 | 774.1259 | 0.14632289 | 0.12764544 | 0.12989052 | 0.997408921 |
| surgical_procedurePartial Resection | 50 | -0.3478059 | 0.00654046 | 0.00716728 | 0.00727153 | 1197 | 879.79046 | 0.11177534 | 0.1005377 | 0.10257548 | 0.99795269 |
| chemotherapyYes | 50 | -0.2197899 | 0.01674117 | 0.00793349 | 0.01755039 | 1197 | 1086.18591 | 0.0483369 | 0.04610817 | 0.04785974 | 0.999043721 |
| radiotherapyYes | 50 | -0.6812608 | 0.0189587 | 0.00196853 | 0.0209666 | 1197 | 898.78694 | 0.10590902 | 0.09576648 | 0.09777191 | 0.998048378 |
| african_american: Public Insurance | 50 | 0.22061071 | 0.03683174 | 0.00243789 | 0.03931838 | 1197 | 1025.70274 | 0.06751365 | 0.06324383 | 0.06506507 | 0.99870039 |
| african_american: Indigent | 50 | 0.77455086 | 0.1764483 | 0.01037071 | 0.18702643 | 1197 | 1050.12313 | 0.05995029 | 0.05655953 | 0.05835123 | 0.998834336 |

**Table 5S.** MICE Diagnostics

| SexMale | **m** | **Estimate** | **Within** | **Between** | **Total** | **dfcom** | **df** | **RIV** | **Lambda** | **FMI** | **Relative Efficiency** |
| --- | --- | --- | --- | --- | --- | --- | --- | --- | --- | --- | --- |
| ADI_NATRANK > 75TRUE | 50 | 0.05219202 | 0.00339298 | 0.00049965 | 0.00390262 | 1197 | 763.0443 | 0.15020393 | 0.13058895 | 0.13285883 | 0.99734987 |
| age_cat75 | 50 | 0.23009093 | 0.00415766 | 0.00069148 | 0.00486297 | 1197 | 710.1873 | 0.16964192 | 0.14503748 | 0.14743506 | 0.99705997 |
| age_cat45-54 | 50 | 1.17297999 | 0.01721763 | 0.05377628 | 0.02270281 | 1197 | 435.7822 | 0.31857937 | 0.24160803 | 0.24506484 | 0.99512261 |
| age_cat55-64 | 50 | 0.30094866 | 0.01311919 | 0.00147523 | 0.01462393 | 1197 | 870.4213 | 0.11469748 | 0.10289561 | 0.10494984 | 0.9979054 |
| age_cat65-74 | 50 | 0.53197471 | 0.01119683 | 0.00166558 | 0.01289573 | 1197 | 758.7342 | 0.15173007 | 0.131741 | 0.13402069 | 0.99732675 |
| african_american | 50 | 0.99245525 | 0.01304317 | 0.00304225 | 0.01614627 | 1197 | 558.7545 | 0.23790994 | 0.19218679 | 0.19506283 | 0.9961139 |
| insurance_catPublic | 50 | -0.2113588 | 0.02022608 | 0.03254312 | 0.02354548 | 1197 | 724.764 | 1.25211692 | 0.55597332 | 0.56307452 | 0.98886392 |
| insurance_catSelf-Pay/Indigent | 50 | -0.2122988 | 0.00556607 | 0.00090439 | 0.00648854 | 1197 | 720.4628 | 1.57781949 | 0.61207524 | 0.61946346 | 0.98776235 |
| IDH-Mut | 50 | 0.08587514 | 0.03175609 | 0.00113674 | 0.03291557 | 1197 | 1120.2047 | 0.19019022 | 0.15979817 | 0.16233596 | 0.99676379 |
| MGMT-methylated | 50 | -0.572072 | 0.01145807 | 0.14065528 | 0.02580491 | 1197 | 122.0569 | 0.16573148 | 0.14216952 | 0.14454097 | 0.99711751 |
| rural | 50 | -0.5806464 | 0.00403037 | 0.0062345 | 0.01038956 | 1197 | 102.0117 | 0.03651194 | 0.03522578 | 0.03694368 | 0.99926167 |
| surgical_procedureComplete resection | 50 | 0.00460526 | 0.00479322 | 0.00089375 | 0.00570484 | 1197 | 659.1512 | 0.10349677 | 0.09378983 | 0.09578223 | 0.99808802 |
| surgical_procedurePartial Resection | 50 | -0.4860164 | 0.00507538 | 0.00051499 | 0.00560067 | 1197 | 906.6632 | 0.12844676 | 0.11382616 | 0.11596069 | 0.99768615 |
| chemotherapyYes | 50 | -0.3522226 | 0.00653183 | 0.00082254 | 0.00737082 | 1197 | 827.322 | 0.09576555 | 0.08739602 | 0.08934788 | 0.99821623 |
| radiotherapyYes | 50 | -0.2243171 | 0.01696827 | 0.00159311 | 0.01859324 | 1197 | 932.111 | 0.1257711 | 0.11171996 | 0.11383851 | 0.9977284 |
| african_american: Public | 50 | -0.6748838 | 0.01921958 | 0.00236987 | 0.02163685 | 1197 | 835.5717 | 0.16411476 | 0.14097816 | 0.14333888 | 0.99714142 |
| african_american: self Pay/Indigent | 50 | 0.26464671 | 0.03681793 | 0.00336499 | 0.04025023 | 1197 | 940.5318 | 0.08150116 | 0.07535929 | 0.07724149 | 0.99845755 |
|  | 50 | 0.76754055 | 0.17638825 | 0.00969563 | 0.1862778 | 1197 | 1062.4099 | 0.0506669 | 0.05309029 | 0.05486784 | 0.99890385 |

**Table 6S.** Patient Demographics

| **Characteristic** | **N = 1,464***1* |
| --- | --- |
| Age at Diagnosis (years) | 60 ± 14 |
| < 45 | 211 (14%) |
| ≥75 | 185 (13%) |
| 45-54 | 231 (16%) |
| 55-64 | 392 (27%) |
| 65-74 | 445 (30%) |
| Sex |  |
| Female | 648 (44%) |
| Male | 816 (56%) |
| Race |  |
| White | 1,224 (84%) |
| Black | 155 (11%) |
| Other | 85 (5.8%) |
| Married | 1,033 (71%) |
| Insurance Status |  |
| Indigent/Self Pay | 51 (3.5%) |
| Medicaid | 111 (7.6%) |
| Medicare | 590 (40%) |
| Private | 712 (49%) |
| Median Household Income (USD) | 50,055 (42,285, 59,264) |
| Vital Status |  |
| Alive | 249 (17%) |
| Deceased | 1,215 (83%) |
| IDH status |  |
| IDH-Mut | 92 (6.3%) |
| IDH-WT | 890 (61%) |
| Unknown | 482 (33%) |
| MGMT status |  |
| Methylated | 344 (23%) |
| Unknown | 576 (39%) |
| Unmethylated | 544 (37%) |
| Extent of Resection |  |
| Biopsy | 430 (29%) |
| Complete resection | 671 (46%) |
| Partial Resection | 363 (25%) |
| History of Radiotherapy | 1,235 (84%) |
| History of Chemotherapy | 1,219 (83%) |
| ADI National Percentile Rank | 66 (46, 84) |
| RUCA |  |
| Metropolitan | 1,062 (73%) |
| Micropolitan | 225 (15%) |
| Rural | 51 (3.5%) |
| Small Town | 126 (8.6%) |
| Distance from Institution |  |
| <60 | 617 (42%) |
| ≥200 | 149 (10%) |
| 60-200 | 698 (48%) |
| Overall Survival (months) | 13.78 (12.99 - 14.76) |
| *1* n (%); Median (IQR)*;* Mean ± SD |  |

**Table 7S.** Results of Multivariate Cox Regression Analysis

| Random Forest | |  |  | Complete Case Analysis | |  |  | Normal MICE | |  |  | Post WHO Guidelines (2017 to present) | | |  |
| --- | --- | --- | --- | --- | --- | --- | --- | --- | --- | --- | --- | --- | --- | --- | --- |
| **Characteristic** | **HR***1* | **95% CI***1* | **p-value** | **Characteristic** | **HR***1* | **95% CI***1* | **p-value** | **Characteristic** | **HR***1* | **95% CI***1* | **p-value** | **Characteristic** | **HR***1* | **95% CI***1* | **p-value** |
| Sex |  |  |  | Sex |  |  |  | Sex |  |  |  | Sex |  |  |  |
| Female | — | — |  | Female | — | — |  | Female | — | — |  | Female | — | — |  |
| Male | 1.06 | 0.94, 1.19 | 0.3 | Male | 1.08 | 0.92, 1.27 | 0.4 | Male | 1.03 | 0.92, 1.16 | 0.6 | Male | 1.05 | 0.87, 1.26 | 0.6 |
| ADI |  |  |  | ADI |  |  |  | ADI |  |  |  | ADI |  |  |  |
| Low ADI | — | — |  | Low ADI | — | — |  | Low ADI | — | — |  | Low ADI | — | — |  |
| **High ADI** | **1.25** | **1.09, 1.43** | **0.001** | **High ADI** | **1.32** | **1.09, 1.60** | **0.005** | **High ADI** | **1.21** | **1.06, 1.38** | **0.005** | High ADI | 1.26 | 1.01, 1.56 | 0.039 |
| Income Class | |  |  | Income Class | |  |  | Income Class | |  |  | Income Class | |  |  |
| Lower Class | — | — |  | Lower Class | — | — |  | Lower Class | — | — |  | Lower Class | — | — |  |
| Middle Class | 0.96 | 0.82, 1.12 | 0.6 | Middle Class | 0.8 | 0.64, 0.99 | 0.043 | Middle Class | 0.98 | 0.83, 1.14 | 0.8 | Middle Class | 0.73 | 0.57, 0.93 | 0.012 |
| Upper Class | 2.26 | 0.72, 7.11 | 0.2 | Upper Class | 2.3 | 0.55, 9.56 | 0.3 | Upper Class | 2.2 | 0.70, 6.92 | 0.2 | Upper Class | 2.31 | 0.55, 9.66 | 0.3 |
| Age |  |  |  | Age |  |  |  | Age |  |  |  | Age |  |  |  |
| < 45 | — | — |  | < 45 | — | — |  | < 45 | — | — |  | < 45 | — | — |  |
| 45-54 | 1.4 | 1.12, 1.75 | 0.003 | 45-54 | 1.4 | 0.99, 1.98 | 0.054 | 45-54 | 1.25 | 1.00, 1.57 | 0.05 | 45-54 | 1.45 | 0.96, 2.19 | 0.081 |
| 55-64 | 1.84 | 1.49, 2.26 | <0.001 | 55-64 | 2.24 | 1.62, 3.09 | <0.001 | 55-64 | 1.63 | 1.32, 2.00 | <0.001 | 55-64 | 2.3 | 1.57, 3.36 | <0.001 |
| 65-74 | 2.99 | 2.39, 3.74 | <0.001 | 65-74 | 4.27 | 2.97, 6.14 | <0.001 | 65-74 | 2.44 | 1.95, 3.04 | <0.001 | 65-74 | 4.7 | 3.10, 7.12 | <0.001 |
| ≥75 | 3.56 | 2.76, 4.60 | <0.001 | ≥75 | 4.47 | 2.96, 6.77 | <0.001 | ≥75 | 2.85 | 2.20, 3.68 | <0.001 | ≥75 | 4.06 | 2.51, 6.56 | <0.001 |
| African American | |  |  | African American | |  |  | African American | |  |  | African American | |  |  |
| Other | — | — |  | Other | — | — |  | Other | — | — |  | Other | — | — |  |
| African American | 0.87 | 0.66, 1.15 | 0.3 | African American | 0.82 | 0.49, 1.35 | 0.4 | African American | 0.8 | 0.60, 1.05 | 0.11 | African American | 0.95 | 0.56, 1.61 | 0.8 |
| Insurance Category | |  |  | Insurance Category | |  |  | Insurance Category | |  |  | Insurance Category | |  |  |
| Private | — | — |  | Private | — | — |  | Private | — | — |  | Private | — | — |  |
| Public | 0.81 | 0.70, 0.93 | 0.004 | Public | 0.68 | 0.54, 0.86 | 0.001 | Public | 0.84 | 0.72, 0.97 | 0.016 | Public | 0.64 | 0.50, 0.83 | <0.001 |
| Self-Pay/Indigent | 1.14 | 0.81, 1.62 | 0.4 | Self-Pay/Indigent | 0.58 | 0.30, 1.10 | 0.1 | Self-Pay/Indigent | 1.15 | 0.81, 1.64 | 0.4 | Self-Pay/Indigent | 0.57 | 0.29, 1.09 | 0.09 |
| IDH status | |  |  | IDH status | |  |  | IDH status | |  |  | IDH status | |  |  |
| Wild Type | — | — |  | Wild Type | — | — |  | Wild Type | — | — |  | Wild Type | — | — |  |
| Mutant | 0.65 | 0.50, 0.83 | <0.001 | Mutant | 0.61 | 0.42, 0.87 | 0.007 | Mutant | 0.51 | 0.41, 0.63 | <0.001 | Mutant | 0.64 | 0.43, 0.96 | 0.032 |
| MGMT status | |  |  | MGMT status | |  |  | MGMT status | |  |  | MGMT status | |  |  |
| Unmethylated | — | — |  | Unmethylated | — | — |  | Unmethylated | — | — |  | Unmethylated | — | — |  |
| Methylated | 0.53 | 0.47, 0.60 | <0.001 | Methylated | 0.51 | 0.43, 0.61 | <0.001 | Methylated | 0.59 | 0.52, 0.66 | <0.001 | Methylated | 0.5 | 0.41, 0.61 | <0.001 |
| Rural |  |  |  | Rural |  |  |  | Rural |  |  |  | Rural |  |  |  |
| Not Rural | — | — |  | Not Rural | — | — |  | Not Rural | — | — |  | Not Rural | — | — |  |
| Rural | 1.02 | 0.89, 1.17 | 0.8 | Rural | 0.87 | 0.72, 1.07 | 0.2 | Rural | 0.99 | 0.86, 1.13 | 0.9 | Rural | 0.89 | 0.71, 1.11 | 0.3 |
| Extent of Resection | |  |  | Extent of Resection | |  |  | Extent of Resection | |  |  | Extent of Resection | |  |  |
| Biopsy | — | — |  | Biopsy | — | — |  | Biopsy | — | — |  | Biopsy | — | — |  |
| Complete resection | 0.65 | 0.56, 0.74 | <0.001 | Complete resection | 0.58 | 0.46, 0.71 | <0.001 | Complete resection | 0.63 | 0.55, 0.73 | <0.001 | Complete resection | 0.53 | 0.42, 0.68 | <0.001 |
| Partial Resection | 0.74 | 0.63, 0.86 | <0.001 | Partial Resection | 0.72 | 0.58, 0.91 | 0.005 | Partial Resection | 0.72 | 0.62, 0.85 | <0.001 | Partial Resection | 0.68 | 0.53, 0.87 | 0.002 |
| Chemotherapy | |  |  | Chemotherapy | |  |  | Chemotherapy | |  |  | Chemotherapy | |  |  |
| No | — | — |  | No | — | — |  | No | — | — |  | No | — | — |  |
| Yes | 0.78 | 0.60, 1.00 | 0.047 | Yes | 0.78 | 0.56, 1.08 | 0.14 | Yes | 0.73 | 0.56, 0.94 | 0.016 | Yes | 0.89 | 0.62, 1.28 | 0.5 |
| Radiotherapy | |  |  | Radiotherapy | |  |  | Radiotherapy | |  |  | Radiotherapy | |  |  |
| No | — | — |  | No | — | — |  | No | — | — |  | No | — | — |  |
| Yes | 0.5 | 0.39, 0.66 | <0.001 | Yes | 0.27 | 0.19, 0.38 | <0.001 | Yes | 0.54 | 0.41, 0.71 | <0.001 | Yes | 0.23 | 0.16, 0.33 | <0.001 |
| African American * Insurance | | |  | African American * Insurance | | |  | African American * Insurance | | |  | African American * Insurance | | |  |
| African American * Public | 1.21 | 0.83, 1.76 | 0.3 | African American * Public | 0.93 | 0.51, 1.72 | 0.8 | African American * Public | 1.31 | 0.90, 1.91 | 0.2 | African American * Public | 0.84 | 0.44, 1.60 | 0.6 |
| African American * Self-Pay/Indigent | 1.85 | 0.81, 4.22 | 0.14 | African American * Self-Pay/Indigent | 3.71 | 0.90, 15.2 | 0.069 | African American * Self-Pay/Indigent | 1.92 | 0.84, 4.37 | 0.12 | African American * Self-Pay/Indigent | 2.23 | 0.43, 11.5 | 0.3 |
| *1* HR = Hazard Ratio, CI = Confidence Interval | | | | *1* HR = Hazard Ratio, CI = Confidence Interval | | | | *1* HR = Hazard Ratio, CI = Confidence Interval | | | | *1* HR = Hazard Ratio, CI = Confidence Interval | | | |

**Table 8S.** Domains of ADI Used in Calculation

| **Education** | **Income** | **Housing** | **Household Characteristics** |
| --- | --- | --- | --- |
| % Population aged 25 years or older with less than 9 years of education  % Population aged 25 years or older with at least a high school diploma  % Employed population aged 16 years or older in white-collar occupations | Median family income in US dollars  Income disparity  % Families below federal poverty level  % Population below 150% of federal poverty level  % Civilian labor force population aged 16 years and older who are unemployed | Median home value in US dollars  Median gross rent in US dollars  Median monthly mortgage in US dollars  % Owner-occupied housing units  % Occupied housing units without complete plumbing | % Single-parent households with children younger than 18  % Households without a motor vehicle  % Households without a telephone  % Households with more than 1 person per room |


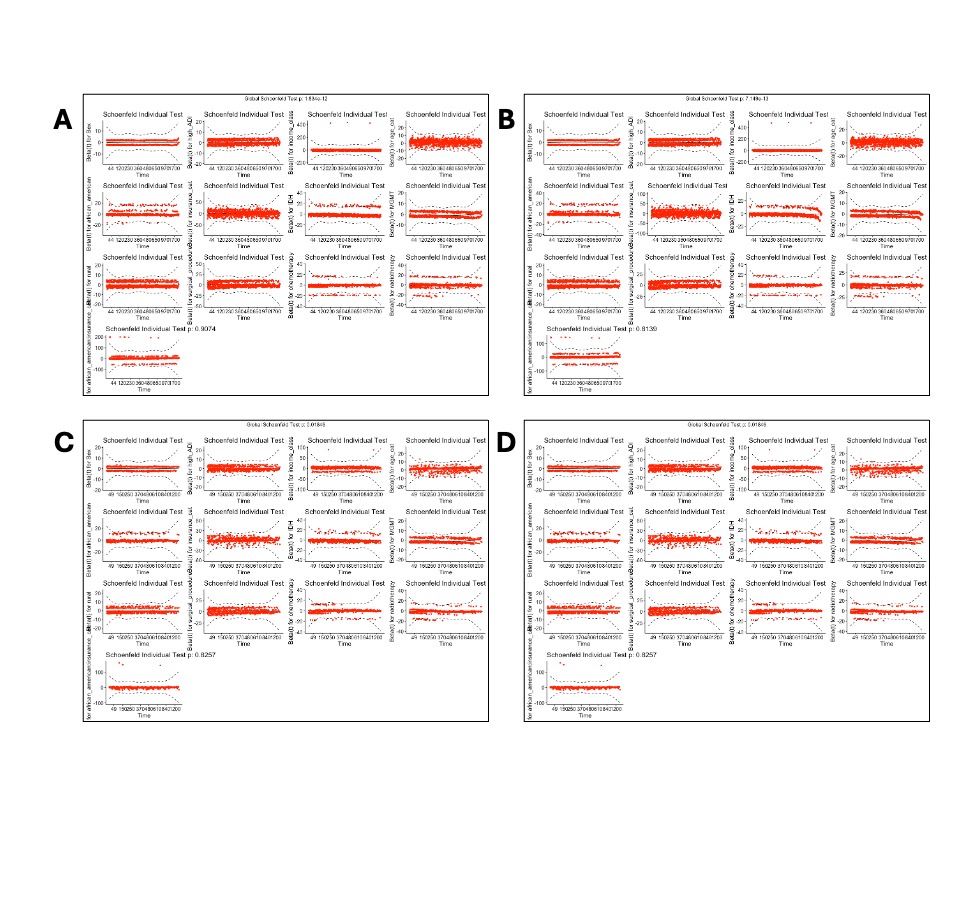


**Figure 1S.** Schoenfeld’s Residuals for **A.** Random Forest imputed **B.** MICE imputed **C.** Complete Case **D.** Post-2016 WHO Guidelines cohorts.


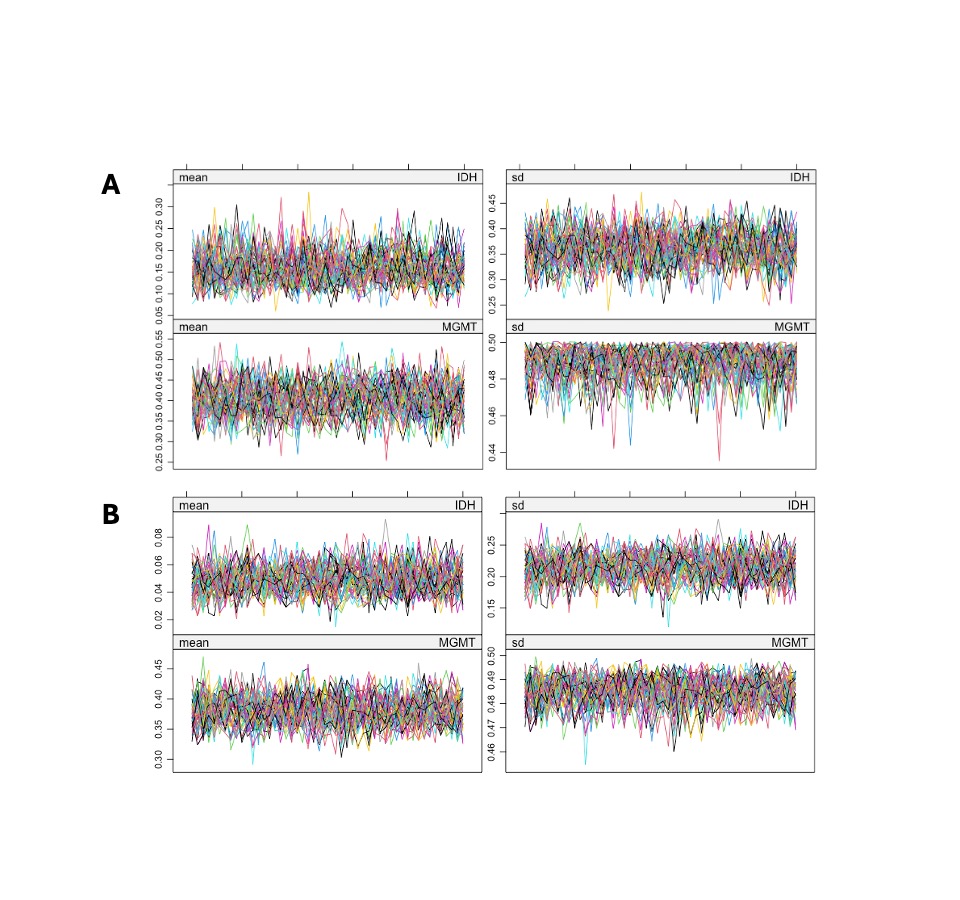


**Figure 2S.** Convergence Plots for **A.** Random Forest imputation **B.** MICE

1. NAMCS/NHAMCS - Ambulatory Health Care Data Homepage. 2023.

2. Bureau USC. Data from: ACS 5-Year Estimates Subject Tables

Income in the Past 12 Months (in 2022 Inflation-Adjusted Dollars). 2022.

3. Kochhar R, Sechopoulos S. How the American middle class has changed in the past five decades. *Pew Research Center* blog. <https://www.pewresearch.org/short-reads/2022/04/20/how-the-american-middle-class-has-changed-in-the-past-five-decades/>

files/68/how-the-american-middle-class-has-changed-in-the-past-five-decades.html

4. In J, Lee DK. Survival analysis: part II - applied clinical data analysis. *Korean J Anesthesiol*. Oct 2019;72(5):441-457. doi:10.4097/kja.19183

5. Louis DN, Perry A, Reifenberger G, et al. The 2016 World Health Organization Classification of Tumors of the Central Nervous System: a summary. *Acta Neuropathol*. Jun 2016;131(6):803-20. doi:10.1007/s00401-016-1545-1

6. Sterne JAC, White IR, Carlin JB, et al. Multiple imputation for missing data in epidemiological and clinical research: potential and pitfalls. *BMJ*. 2009;338:b2393. doi:10.1136/bmj.b2393
